# Supplementary material for: 1,3-Dipolar additions involving allenes: A density functional study of concerted and stepwise mechanismsElectronic supplementary information (ESI) available: Cartesian co-ordinates of all the structures with their computed total energies. See http://www.rsc.org/suppdata/p2/b2/b206470g
Source: Royal Society of Chemistry journal article supplement (doi:10.1039/b206470g), 2002-10-25
Supplement: tables.pdf [file tables.pdf]

### Supporting Information Available

Manuscript : 1,3-Dipolar Additions Involving Allenes :  
A Density Functional Study of Concerted  
and Stepwise Mechanisms.

Authors : K.Kavitha and P.Venuvanalingam

Address : Department of Chemistry, Bharathidasan  
University, Tiruchirappalli - 24.

**Cartesian co-ordinates of all the structures with their  
computed total energies:**

#### ALLENE-NITRONE

##### CONCERTED TS1

|    |   |         |         |         |
|----|---|---------|---------|---------|
| 1  | C | -1.6943 | 0.5070  | -0.2798 |
| 2  | N | -1.3685 | -0.6656 | 0.2526  |
| 3  | O | -0.3036 | -1.2692 | -0.1502 |
| 4  | C | 1.1202  | 0.3317  | 0.0338  |
| 5  | C | 0.3382  | 1.4339  | 0.1332  |
| 6  | C | 2.2205  | -0.3812 | -0.0386 |
| 7  | H | -1.6399 | -0.8317 | 1.2282  |
| 8  | H | -2.5113 | 1.0531  | 0.1820  |
| 9  | H | -1.5192 | 0.6199  | -1.3404 |
| 10 | H | 0.0912  | 1.8472  | 1.1092  |
| 11 | H | 0.2774  | 2.1342  | -0.6969 |
| 12 | H | 3.1956  | 0.0957  | 0.0627  |
| 13 | H | 2.2067  | -1.4542 | -0.2024 |

Total Energy = -286.4289 Hartrees

##### ANTI TS1

|    |   |         |         |         |
|----|---|---------|---------|---------|
| 1  | C | -0.3681 | -0.2355 | 0.5515  |
| 2  | C | -1.6670 | -0.1927 | 0.1663  |
| 3  | C | -2.8932 | -0.0517 | -0.2447 |
| 4  | C | 0.6594  | 0.9220  | -0.1863 |
| 5  | N | 1.9239  | 0.3599  | 0.0137  |
| 6  | H | -0.2334 | -0.1998 | 1.6410  |
| 7  | H | 0.3582  | -1.0592 | 0.1257  |
| 8  | H | -3.5428 | -0.9098 | -0.4299 |
| 9  | H | -3.3412 | 0.9291  | -0.4225 |
| 10 | H | 0.5400  | 1.9135  | 0.2557  |
| 11 | H | 0.3728  | 0.8876  | -1.2364 |
| 12 | O | 1.9589  | -0.9091 | -0.3371 |
| 13 | H | 2.3200  | 0.5400  | 0.9460  |

Total Energy = -286.4335 Hartrees

**ANTI INT1**

|    |   |        |        |         |
|----|---|--------|--------|---------|
| 1  | N | .0000  | .0000  | .0000   |
| 2  | C | 1.4645 | .0000  | .0000   |
| 3  | C | 2.0864 | 1.4021 | .0000   |
| 4  | C | 3.5049 | 1.3372 | .0627   |
| 5  | C | 4.7714 | 1.2403 | -.1906  |
| 6  | O | -.6218 | -.0838 | -1.0422 |
| 7  | H | -.4173 | .4991  | .7791   |
| 8  | H | 1.7921 | -.5567 | .9211   |
| 9  | H | 1.8153 | -.5630 | -.9091  |
| 10 | H | 1.7136 | 1.9887 | .8893   |
| 11 | H | 1.7613 | 1.9620 | -.9242  |
| 12 | H | 5.1717 | 1.0196 | -1.1938 |
| 13 | H | 5.5303 | 1.3769 | .5955   |

Total Energy = -286.4742 Hartrees

**ROT TS 1**

|    |   |        |        |         |
|----|---|--------|--------|---------|
| 1  | C | .0000  | .0000  | .0000   |
| 2  | C | 1.2951 | .0000  | .0000   |
| 3  | C | 2.6762 | .3382  | .0000   |
| 4  | C | 2.9030 | 1.8375 | -.2652  |
| 5  | N | 3.8817 | 2.4695 | .6216   |
| 6  | O | 3.5569 | 3.3903 | 1.3465  |
| 7  | H | -.6054 | .9210  | .0185   |
| 8  | H | -.5759 | -.9384 | -.0130  |
| 9  | H | 3.2025 | -.2561 | -.7996  |
| 10 | H | 3.1216 | .0275  | .9886   |
| 11 | H | 4.6453 | 1.8659 | .9091   |
| 12 | H | 1.9315 | 2.4007 | -.1781  |
| 13 | H | 3.2909 | 1.9685 | -1.3140 |

Total Energy = -286.4353 Hartrees

**GAUCHE INT1**

|    |   |         |        |        |
|----|---|---------|--------|--------|
| 1  | C | .0000   | .0000  | .0000  |
| 2  | C | 1.5314  | .0000  | .0000  |
| 3  | C | 2.0926  | 1.3080 | .0000  |
| 4  | C | 2.4017  | 2.5149 | .3599  |
| 5  | N | -.6111  | .1695  | 1.3215 |
| 6  | H | -.3583  | -.9933 | -.3908 |
| 7  | H | -.3700  | .8128  | -.6874 |
| 8  | H | 1.9237  | -.5907 | .8756  |
| 9  | H | 1.8679  | -.5291 | -.9384 |
| 10 | H | 2.0243  | 2.9766 | 1.2876 |
| 11 | H | 3.0628  | 3.1460 | -.2522 |
| 12 | O | -.2771  | 1.0585 | 2.0802 |
| 13 | H | -1.5628 | -.1798 | 1.3735 |

Total Energy = -286.4768 Hartrees

## GAUCHE TS1

|    |   |          |          |         |
|----|---|----------|----------|---------|
| 1  | C | -0.51487 | -0.60179 | 2.27931 |
| 2  | C | 0.36454  | -0.01923 | 3.12819 |
| 3  | C | 1.60198  | -0.74883 | 3.41677 |
| 4  | C | 1.20925  | -2.17869 | 3.93429 |
| 5  | N | 0.00000  | -2.69833 | 3.35726 |
| 6  | H | -0.21394 | -1.29901 | 1.49085 |
| 7  | H | -1.56819 | -0.29344 | 2.24293 |
| 8  | H | 2.24132  | -0.21981 | 4.16871 |
| 9  | H | 2.22203  | -0.88673 | 2.49227 |
| 10 | O | -1.15625 | -2.21645 | 3.89235 |
| 11 | H | 1.13125  | -2.08240 | 5.05452 |
| 12 | H | 2.10262  | -2.83250 | 3.72421 |
| 13 | H | 0.00000  | -3.40768 | 2.56959 |

Total Energy = -286.4549 Hartrees

## ALLYLIC TS 1

|    |   |          |          |          |
|----|---|----------|----------|----------|
| 1  | C | -2.20250 | 1.40882  | -2.06218 |
| 2  | C | -2.63346 | 0.44804  | -1.78061 |
| 3  | O | -2.40598 | -1.31114 | -2.71230 |
| 4  | N | -0.99868 | -1.40981 | -2.55303 |
| 5  | C | 0.00000  | -1.08861 | -2.07699 |
| 6  | C | -3.63744 | 0.04877  | -0.64749 |
| 7  | H | -2.43996 | 2.32220  | -1.50739 |
| 8  | H | -1.50840 | 1.50351  | -2.90300 |
| 9  | H | -4.06140 | -0.92142 | -0.37066 |
| 10 | H | -3.94476 | 0.91227  | -0.04851 |
| 11 | H | -0.83467 | -2.19186 | -3.24952 |
| 12 | H | 0.94349  | -1.39378 | -2.52953 |
| 13 | H | 0.00000  | -0.47901 | -1.17339 |

Total Energy = -286.4406 Hartrees

## ALLYLIC INT1

|    |   |        |         |         |
|----|---|--------|---------|---------|
| 1  | C | .0000  | .0000   | .0000   |
| 2  | C | 1.3858 | .0000   | .0000   |
| 3  | C | 2.1147 | 1.3169  | .0000   |
| 4  | N | 2.6462 | 1.7120  | -1.3081 |
| 5  | O | 3.8167 | 1.5298  | -1.5829 |
| 6  | C | 2.1357 | -1.1679 | .0128   |
| 7  | H | -.5731 | -.9335  | .0092   |
| 8  | H | -.5751 | .9300   | -.0016  |
| 9  | H | 1.4188 | 2.1413  | .3249   |
| 10 | H | 2.9755 | 1.2654  | .7257   |
| 11 | H | 1.9607 | 1.7107  | -2.0566 |
| 12 | H | 3.2293 | -1.1480 | .0002   |
| 13 | H | 1.6536 | -2.1509 | .0391   |

Total Energy= -286.4384 Hartrees

ALLYLIC TS 2

|    |   |         |         |         |
|----|---|---------|---------|---------|
| 1  | C | -2.1269 | .1680   | .4718   |
| 2  | C | -.7653  | .1680   | .4718   |
| 3  | O | -.1575  | 1.4530  | .4718   |
| 4  | N | 1.1404  | 1.4963  | .1058   |
| 5  | C | 1.5022  | .4680   | -.7739  |
| 6  | C | .0934   | -.9667  | .4065   |
| 7  | H | -2.6866 | -.7719  | .5028   |
| 8  | H | -2.7012 | 1.1004  | .4786   |
| 9  | H | 1.7181  | 1.4633  | .9454   |
| 10 | H | .8910   | .3327   | -1.6740 |
| 11 | H | 2.5336  | .1004   | -.7555  |
| 12 | H | .9623   | -1.0649 | 1.0637  |
| 13 | H | -.2369  | -1.8585 | -.1317  |

Total Energy = -286.4289 Hartrees

REGIO 1 PRODUCT

|    |   |          |          |          |
|----|---|----------|----------|----------|
| 1  | C | -0.01000 | -2.37750 | -0.00000 |
| 2  | N | -0.01000 | -3.66621 | 0.27392  |
| 3  | O | -1.19279 | -4.07419 | 0.68342  |
| 4  | C | -2.16417 | -2.95273 | 0.71014  |
| 5  | C | -1.34795 | -1.77690 | 0.23746  |
| 6  | C | -1.72763 | -0.51611 | 0.07319  |
| 7  | H | 0.86699  | -1.83214 | -0.35525 |
| 8  | H | -2.51582 | -2.86367 | 1.76447  |
| 9  | H | -2.99229 | -3.23471 | 0.01887  |
| 10 | H | -1.03665 | 0.26062  | -0.28058 |
| 11 | H | -2.75177 | -0.17932 | 0.28109  |
| 12 | H | 0.72651  | -1.87186 | 0.62449  |
| 13 | H | 0.00000  | -4.70305 | 0.49431  |

Total Energy = -286.5125 Hartrees

CONCERTED TS2

|    |   |         |         |         |
|----|---|---------|---------|---------|
| 1  | C | -.2051  | -.9417  | -.9789  |
| 2  | N | 1.1560  | -.9417  | -.9789  |
| 3  | O | 1.7334  | .1647   | -.9789  |
| 4  | C | .7148   | 1.2388  | .4375   |
| 5  | C | -.4228  | .5178   | .5654   |
| 6  | C | -1.5881 | .2506   | 1.0917  |
| 7  | H | 1.6091  | -1.6901 | -.4592  |
| 8  | H | -.7287  | -1.8694 | -.7022  |
| 9  | H | -.7218  | -.2446  | -1.6608 |
| 10 | H | .7712   | 2.0984  | -.2462  |
| 11 | H | 1.5653  | 1.0940  | 1.1192  |
| 12 | H | -2.2038 | -.6081  | .7938   |
| 13 | H | -2.0335 | .8850   | 1.8736  |

Total Energy = -286.4272 Hartrees

**ANTI TS2**

|    |   |         |         |        |
|----|---|---------|---------|--------|
| 1  | C | -1.7214 | -2.3970 | .0000  |
| 2  | N | -.3938  | -2.3970 | .0000  |
| 3  | O | .3638   | -1.3633 | .0000  |
| 4  | C | .1284   | .2058   | .0003  |
| 5  | C | 1.3986  | .7540   | .0313  |
| 6  | C | 2.6879  | .9041   | .0610  |
| 7  | H | -2.2853 | -3.3387 | .0011  |
| 8  | H | -2.2577 | -1.4379 | -.0008 |
| 9  | H | .0660   | -3.3071 | .0011  |
| 10 | H | -.4857  | .3852   | .9118  |
| 11 | H | -.4428  | .3903   | -.9376 |
| 12 | H | 3.1518  | 1.9011  | .0761  |
| 13 | H | 3.3950  | .0604   | .0731  |

Total Energy = -286.3903 Hartrees

**ANTI INT2**

|    |   |         |         |        |
|----|---|---------|---------|--------|
| 1  | O | .0000   | .0000   | .0000  |
| 2  | C | 1.4538  | .0000   | .0000  |
| 3  | C | 1.8748  | 1.3679  | .0000  |
| 4  | C | 1.8901  | 2.6619  | .0638  |
| 5  | N | -.6468  | -1.1839 | .0502  |
| 6  | C | -.0206  | -2.3427 | -.3306 |
| 7  | H | 1.8332  | -.5316  | .9163  |
| 8  | H | 1.8259  | -.5180  | -.9287 |
| 9  | H | .9882   | 3.2653  | .2601  |
| 10 | H | 2.8200  | 3.2347  | -.0730 |
| 11 | H | -1.5337 | -1.0426 | -.4332 |
| 12 | H | -.6521  | -3.1951 | -.5985 |
| 13 | H | 1.0481  | -2.4927 | -.1682 |

Total Energy = -286.4226 Hartrees

**ROT TS2**

|    |   |          |         |         |
|----|---|----------|---------|---------|
| 1  | C | 2.39140  | 1.12005 | 2.65754 |
| 2  | C | 2.57642  | 2.26471 | 3.23645 |
| 3  | C | 2.33638  | 3.56617 | 3.79474 |
| 4  | O | 1.10630  | 4.22836 | 3.35023 |
| 5  | N | 0.00000  | 3.77183 | 3.79117 |
| 6  | H | 1.40173  | 0.74598 | 2.34697 |
| 7  | H | 3.23393  | 0.44355 | 2.45005 |
| 8  | H | 3.15972  | 4.26272 | 3.44719 |
| 9  | H | 2.39723  | 3.49782 | 4.92392 |
| 10 | C | -1.16538 | 4.25206 | 3.32734 |
| 11 | H | -1.29486 | 4.97711 | 2.50865 |
| 12 | H | -2.06484 | 3.83331 | 3.80476 |
| 13 | H | 0.00000  | 3.01659 | 4.52063 |

Total Energy = -286.4190 Hartrees

**GAUCHE INT2**

|    |   |          |          |          |
|----|---|----------|----------|----------|
| 1  | O | -1.31238 | -1.72279 | -0.91329 |
| 2  | C | -0.21376 | -2.78919 | -0.94501 |
| 3  | C | 0.87273  | -2.45037 | -1.79972 |
| 4  | C | 1.89121  | -1.82986 | -2.30899 |
| 5  | N | -1.05373 | -0.60593 | 0.00009  |
| 6  | H | 0.16195  | -2.99647 | 0.09681  |
| 7  | H | -0.68104 | -3.74242 | -1.32812 |
| 8  | H | 2.28898  | -0.89058 | -1.88976 |
| 9  | H | 2.41364  | -2.21460 | -3.19728 |
| 10 | C | 0.00000  | 0.00000  | 0.00000  |
| 11 | H | -1.89517 | -0.11457 | 0.28468  |
| 12 | H | 0.94349  | -0.54582 | -0.00006 |
| 13 | H | 0.00000  | 1.09000  | -0.00010 |

Total Energy = -286.4385 Hartrees

**GAUCHE TS2**

|    |   |          |          |          |
|----|---|----------|----------|----------|
| 1  | C | -1.86514 | -2.90583 | 1.08707  |
| 2  | C | -1.11267 | -3.67440 | 0.26462  |
| 3  | C | -0.01000 | -3.09546 | -0.04329 |
| 4  | N | -0.01000 | -1.81290 | -0.72524 |
| 5  | O | -0.92793 | -0.98331 | -0.03014 |
| 6  | H | -1.43782 | -2.26383 | 1.86398  |
| 7  | H | -2.95928 | -2.99507 | 1.11483  |
| 8  | H | 0.10682  | -3.59468 | 0.99169  |
| 9  | C | -2.15216 | -1.23610 | -0.57128 |
| 10 | H | -3.01857 | -0.65418 | -0.25693 |
| 11 | H | -2.26406 | -2.02112 | -1.31915 |
| 12 | H | 0.93728  | -3.57160 | 0.20979  |
| 13 | H | 0.00000  | -0.85048 | -1.23696 |

Total Energy = -286.4222 Hartrees

**ALLYLIC TS3**

|    |   |          |          |          |
|----|---|----------|----------|----------|
| 1  | C | 1.00384  | -2.58846 | -1.38814 |
| 2  | C | 1.39590  | -2.13122 | -0.47967 |
| 3  | C | 1.40749  | -0.18590 | 0.00002  |
| 4  | N | 0.00000  | 0.00000  | 0.00000  |
| 5  | O | -1.08210 | -0.39524 | 0.00003  |
| 6  | C | 2.16359  | -2.73640 | 0.74334  |
| 7  | H | 1.10051  | -3.66364 | -1.57009 |
| 8  | H | 0.48954  | -1.99853 | -2.15312 |
| 9  | H | 1.84961  | -0.19160 | 0.91472  |
| 10 | H | 2.55001  | -2.26802 | 1.65380  |
| 11 | H | 2.32122  | -3.81461 | 0.63620  |
| 12 | H | 1.98254  | -0.31465 | -0.91696 |
| 13 | H | 0.00000  | 1.06000  | -0.00010 |

Total Energy = -286.4364 Hartrees

ALLYLIC INT 2

|    |   |         |         |        |
|----|---|---------|---------|--------|
| 1  | C | -1.9778 | -.8522  | .0000  |
| 2  | C | -.5838  | -.8522  | .0000  |
| 3  | C | .2040   | -1.9912 | .0000  |
| 4  | O | -.0584  | .4605   | -.0601 |
| 5  | N | 1.2329  | .6109   | .3189  |
| 6  | C | 1.3883  | 1.1975  | 1.5619 |
| 7  | H | -2.5468 | .0811   | .0092  |
| 8  | H | -2.5268 | -1.7966 | -.0286 |
| 9  | H | .5992   | 1.1149  | 2.3121 |
| 10 | H | -.2694  | -2.9779 | .0148  |
| 11 | H | 1.6983  | 1.1254  | -.4249 |
| 12 | H | 2.3570  | 1.6477  | 1.7913 |
| 13 | H | 1.2964  | -1.9598 | -.0016 |

Total Energy = -286.5020 Hartrees

ALLYLIC TS4

|    |   |         |         |         |
|----|---|---------|---------|---------|
| 1  | C | .1898   | -1.3749 | -.3111  |
| 2  | N | 1.6642  | -1.3749 | -.3111  |
| 3  | O | 2.1382  | -.2179  | -.3111  |
| 4  | C | .7072   | .8278   | .6883   |
| 5  | C | -.3154  | -.1833  | .4827   |
| 6  | C | -1.5770 | -.1073  | .9079   |
| 7  | H | 2.0332  | -1.9883 | .4157   |
| 8  | H | -.1948  | -2.3433 | .1036   |
| 9  | H | -.1566  | -1.2713 | -1.3767 |
| 10 | H | .7635   | 1.6828  | .0092   |
| 11 | H | 1.2276  | .8847   | 1.6478  |
| 12 | H | -2.3085 | -.9038  | .7212   |
| 13 | H | -1.9572 | .7592   | 1.4638  |

Total Energy = -286.4700 Hartrees

REGIO 2 PRODUCT

|    |   |         |        |         |
|----|---|---------|--------|---------|
| 1  | C | .0000   | .0000  | .0000   |
| 2  | N | 1.4824  | .0000  | .0000   |
| 3  | O | 1.9102  | 1.2870 | .0000   |
| 4  | C | .8311   | 2.2320 | .2674   |
| 5  | C | -.4286  | 1.4227 | .2567   |
| 6  | C | -1.6691 | 1.8613 | .4266   |
| 7  | H | 1.7916  | -.4188 | .8788   |
| 8  | H | -.4239  | -.7079 | .7591   |
| 9  | H | -.3314  | -.3311 | -1.0219 |
| 10 | H | .8772   | 2.9905 | -.5525  |
| 11 | H | 1.0358  | 2.7068 | 1.2591  |
| 12 | H | -2.5372 | 1.1898 | .4003   |
| 13 | H | -1.8987 | 2.9207 | .6004   |

Total Energy = -286.5158 Hartrees

ALLENE - DIAZOMETHANE

CONCERTED TS1

|    |   |         |         |         |
|----|---|---------|---------|---------|
| 1  | C | -1.8343 | 0.4669  | -0.0000 |
| 2  | N | -1.3390 | -0.7797 | 0.0000  |
| 3  | N | -0.3619 | -1.4027 | 0.0000  |
| 4  | C | 1.1194  | 0.3354  | -0.0000 |
| 5  | C | 0.2897  | 1.3999  | 0.0000  |
| 6  | C | 2.2478  | -0.3412 | -0.0000 |
| 7  | H | -2.3490 | 0.7369  | 0.9200  |
| 8  | H | -2.3489 | 0.7369  | -0.9200 |
| 9  | H | 0.0899  | 1.9452  | 0.9195  |
| 10 | H | 0.0899  | 1.9452  | -0.9195 |
| 11 | H | 3.2093  | 0.1746  | 0.0000  |
| 12 | H | 2.2804  | -1.4274 | -0.0000 |

Total Energy = -265.3679 Hartrees

ANTI TS 1

|    |   |          |          |          |
|----|---|----------|----------|----------|
| 1  | C | -0.36810 | -0.23550 | 0.55150  |
| 2  | C | -1.66700 | 0.06287  | 0.30414  |
| 3  | C | -2.89320 | 0.44980  | 0.10644  |
| 4  | C | 0.65940  | 1.10966  | 0.82484  |
| 5  | N | 1.92390  | 0.56638  | 0.57824  |
| 6  | H | -0.23340 | -0.96665 | 1.36002  |
| 7  | H | 0.35820  | -0.53223 | -0.32699 |
| 8  | H | -3.54280 | -0.03881 | -0.62287 |
| 9  | H | -3.34120 | 1.27884  | 0.65986  |
| 10 | H | 0.54000  | 1.51584  | 1.83154  |
| 11 | H | 0.37280  | 1.81437  | 0.04556  |
| 12 | N | 1.95890  | -0.10277 | -0.55563 |

Total Energy = -265.3799 Hartrees

ANTI INT1

|    |   |        |        |         |
|----|---|--------|--------|---------|
| 1  | N | .0000  | .0000  | .0000   |
| 2  | C | 1.4588 | .0000  | .0000   |
| 3  | C | 2.1093 | 1.3867 | .0000   |
| 4  | C | 3.5257 | 1.2949 | .0528   |
| 5  | C | 4.7983 | 1.1423 | -.1280  |
| 6  | N | -.8597 | .4927  | -.5863  |
| 7  | H | 1.7626 | -.5539 | .9321   |
| 8  | H | 1.8087 | -.5893 | -.8936  |
| 9  | H | 1.7523 | 1.9733 | .8965   |
| 10 | H | 1.7952 | 1.9626 | -.9175  |
| 11 | H | 5.2321 | .7579  | -1.0656 |
| 12 | H | 5.5295 | 1.3940 | .6563   |

Total Energy = -265.4267 Hartrees



**ROT TS 1**

|    |   |        |        |         |
|----|---|--------|--------|---------|
| 1  | C | .0000  | .0000  | .0000   |
| 2  | C | 1.2950 | .0000  | .0000   |
| 3  | C | 2.6789 | .3246  | .0000   |
| 4  | C | 2.9329 | 1.7763 | -.4411  |
| 5  | N | 3.6972 | 2.6248 | .4591   |
| 6  | H | -.6061 | .9205  | -.0036  |
| 7  | H | -.5773 | -.9377 | .0072   |
| 8  | H | 3.2136 | -.3641 | -.7156  |
| 9  | H | 3.1032 | .1181  | 1.0234  |
| 10 | H | 1.9540 | 2.3107 | -.6022  |
| 11 | H | 3.4972 | 1.7776 | -1.4157 |
| 12 | N | 4.1984 | 2.5825 | 1.4943  |

Total Energy = -265.3850 Hartrees

**GAUCHE INT1**

|    |   |        |        |        |
|----|---|--------|--------|--------|
| 1  | N | .0000  | .0000  | .0000  |
| 2  | C | 1.4542 | .0000  | .0000  |
| 3  | C | 2.1467 | 1.3645 | .0000  |
| 4  | C | 1.9199 | 2.1113 | 1.1862 |
| 5  | C | 1.5057 | 2.8618 | 2.1558 |
| 6  | N | -.8682 | .7566  | -.0009 |
| 7  | H | 1.7661 | -.5682 | -.9207 |
| 8  | H | 1.7656 | -.5861 | .9099  |
| 9  | H | 3.2562 | 1.1801 | -.1031 |
| 10 | H | 1.8259 | 1.9634 | -.9002 |
| 11 | H | .4917  | 3.2933 | 2.1920 |
| 12 | H | 2.1503 | 3.1058 | 3.0149 |

Total Energy = -265.4278 Hartrees

**GAUCHE TS1**

|    |   |          |          |          |
|----|---|----------|----------|----------|
| 1  | C | 0.00000  | 0.00000  | 0.00000  |
| 2  | C | 1.35400  | 0.00000  | 0.00000  |
| 3  | C | 2.02471  | -1.25223 | -0.35907 |
| 4  | C | 1.47890  | -2.38028 | 0.58758  |
| 5  | N | 0.10817  | -2.20202 | 0.98077  |
| 6  | H | -0.59885 | -0.66053 | -0.63516 |
| 7  | H | -0.57426 | 0.76786  | 0.53526  |
| 8  | H | 3.13898  | -1.17542 | -0.27829 |
| 9  | H | 1.78849  | -1.55672 | -1.41247 |
| 10 | N | -0.10000 | -1.30000 | 1.98000  |
| 11 | H | 2.17198  | -2.38887 | 1.47630  |
| 12 | H | 1.64612  | -3.34726 | 0.03378  |

Total Energy = -265.4006 Hartrees

**ALLYLIC TS1**

|    |   |          |          |          |
|----|---|----------|----------|----------|
| 1  | C | -1.89933 | -2.73357 | -0.09217 |
| 2  | C | -2.19249 | -2.00325 | -0.77260 |
| 3  | N | -2.47889 | 0.00107  | -0.31142 |
| 4  | N | -1.12003 | 0.26958  | 0.00002  |
| 5  | C | 0.00000  | 0.00000  | 0.00000  |
| 6  | C | -2.78348 | -1.96865 | -2.22366 |
| 7  | H | -1.86414 | -3.77559 | -0.42597 |
| 8  | H | -1.56065 | -2.52598 | 0.92760  |
| 9  | H | -3.12833 | -1.16363 | -2.87992 |
| 10 | H | -2.79954 | -2.98340 | -2.63462 |
| 11 | H | 1.05741  | -0.26480 | -0.00002 |
| 12 | H | -0.00000 | 1.09000  | 0.00010  |

Total Energy = -265.3615 Hartrees

**ALLYLIC INT1**

|    |   |          |          |          |
|----|---|----------|----------|----------|
| 1  | C | 0.00000  | 0.00000  | 0.00000  |
| 2  | C | 1.38580  | 0.00000  | 0.00000  |
| 3  | C | 2.11470  | 1.28812  | 0.27380  |
| 4  | N | 2.64620  | 1.94656  | -0.92357 |
| 5  | N | 3.81670  | 1.82547  | -1.23025 |
| 6  | C | 2.13570  | -1.14504 | -0.23030 |
| 7  | H | -0.57310 | -0.91501 | -0.18509 |
| 8  | H | -0.57510 | 0.91001  | 0.19179  |
| 9  | H | 1.41880  | 2.02696  | 0.76300  |
| 10 | H | 2.97550  | 1.08687  | 0.97293  |
| 11 | H | 3.22930  | -1.12296 | -0.23849 |
| 12 | H | 1.65360  | -2.11203 | -0.40895 |

Total Energy = -265.3905 Hartrees

**ALLYLIC TS2**

|    |   |          |          |          |
|----|---|----------|----------|----------|
| 1  | C | 2.46564  | -1.28467 | 0.29993  |
| 2  | C | 1.21777  | -1.58573 | 0.68193  |
| 3  | C | -0.00000 | -1.09000 | 0.00000  |
| 4  | N | -1.13093 | -1.43171 | 0.47005  |
| 5  | N | -1.16163 | -2.11509 | 1.46289  |
| 6  | C | 0.93266  | -2.43215 | 1.80067  |
| 7  | H | 3.33860  | -1.68208 | 0.84243  |
| 8  | H | 2.65876  | -0.63172 | -0.56601 |
| 9  | H | 0.05425  | -0.45072 | -0.89599 |
| 10 | H | 0.91331  | -3.52356 | 1.66614  |
| 11 | H | 0.96235  | -2.01703 | 2.81874  |
| 12 | H | 0.00000  | 0.00000  | 0.00000  |

Total Energy = -265.3806 Hartrees

S10

**REGIO 1 PRODUCT**

|    |   |         |         |         |
|----|---|---------|---------|---------|
| 1  | C | 0.1331  | -1.1931 | 0.0003  |
| 2  | C | -0.7937 | 0.0004  | 0.0005  |
| 3  | C | 0.1338  | 1.1933  | 0.0003  |
| 4  | N | 1.5109  | 0.6205  | -0.0004 |
| 5  | N | 1.5107  | -0.6212 | -0.0003 |
| 6  | C | -2.1250 | 0.0001  | -0.0003 |
| 7  | H | 0.0385  | -1.8386 | -0.8820 |
| 8  | H | 0.0388  | -1.8389 | 0.8825  |
| 9  | H | 0.0404  | 1.8388  | 0.8827  |
| 10 | H | 0.0392  | 1.8396  | -0.8814 |
| 11 | H | -2.6994 | 0.9231  | -0.0009 |
| 12 | H | -2.6984 | -0.9234 | -0.0007 |

Total Energy = -265.4629 Hartrees

**CONCERTED TS 2**

|    |   |          |          |          |
|----|---|----------|----------|----------|
| 1  | C | 0.48608  | -1.31564 | 0.0001   |
| 2  | N | 1.53591  | -0.48193 | -0.0001  |
| 3  | N | 1.88306  | 0.61964  | -0.0001  |
| 4  | C | -0.39551 | 1.46466  | 0.0001   |
| 5  | C | -1.06429 | 0.29008  | 0.0000   |
| 6  | C | -2.18869 | -0.40478 | -0.00013 |
| 7  | H | 0.38078  | -1.88598 | 0.92074  |
| 8  | H | 0.38066  | -1.8866  | -0.92004 |
| 9  | H | -0.17117 | 1.9932   | -0.9226  |
| 10 | H | -0.17126 | 1.99319  | 0.92284  |
| 11 | H | -2.22665 | -1.49084 | -0.00013 |
| 12 | H | -3.1507  | 0.10713  | -0.00024 |

Total Energy = -265.3681 Hartrees

**ANTI TS2**

|    |   |         |         |        |
|----|---|---------|---------|--------|
| 1  | C | -1.3019 | -2.3539 | .0000  |
| 2  | N | .0405   | -2.3539 | .0000  |
| 3  | N | 1.0707  | -1.8154 | .0000  |
| 4  | C | 1.2999  | .0305   | .1070  |
| 5  | C | 1.2867  | .3592   | 1.4218 |
| 6  | C | 1.2564  | .4995   | 2.7108 |
| 7  | H | -1.8095 | -2.7906 | -.8672 |
| 8  | H | -1.8323 | -2.1766 | .9428  |
| 9  | H | 2.2826  | .0460   | -.4109 |
| 10 | H | .4510   | .3877   | -.5140 |
| 11 | H | 1.0842  | -.3405  | 3.4013 |
| 12 | H | 1.4065  | 1.4772  | 3.1933 |

Total Energy = -265.3539 Hartrees

**ANTI INT2**

|    |   |        |        |        |
|----|---|--------|--------|--------|
| 1  | C | .0000  | .0000  | .0000  |
| 2  | N | 1.3582 | .0000  | .0000  |
| 3  | N | 2.1323 | .9731  | .0000  |
| 4  | C | 1.7019 | 2.3803 | -.0017 |
| 5  | C | 2.8020 | 3.3024 | .0180  |
| 6  | C | 4.0227 | 3.7390 | .0392  |
| 7  | H | -.6401 | .8953  | .0015  |
| 8  | H | -.4788 | -.9890 | -.0007 |
| 9  | H | 1.0792 | 2.5988 | -.9237 |
| 10 | H | 1.0487 | 2.5967 | .8995  |
| 11 | H | 4.9011 | 3.0725 | .0556  |
| 12 | H | 4.2482 | 4.8160 | .0419  |

Total Energy = -265.3854 Hartrees

**ROT TS2**

|    |   |        |        |         |
|----|---|--------|--------|---------|
| 1  | C | .0000  | .0000  | .0000   |
| 2  | C | 1.2960 | .0000  | .0000   |
| 3  | C | 2.6606 | .4483  | .0000   |
| 4  | N | 2.8713 | 1.8344 | -.4284  |
| 5  | N | 2.5071 | 2.7591 | .3710   |
| 6  | H | -.6104 | .9152  | .0752   |
| 7  | H | -.5699 | -.9387 | -.0679  |
| 8  | H | 3.2381 | -.1611 | -.7609  |
| 9  | H | 3.1133 | .2455  | 1.0185  |
| 10 | C | 2.5577 | 4.0456 | -.0114  |
| 11 | H | 2.8139 | 4.4204 | -1.0147 |
| 12 | H | 2.2727 | 4.7736 | .7639   |

Total Energy = -265.3703 Hartrees

**GAUCHE INT 2**

|    |   |         |        |        |
|----|---|---------|--------|--------|
| 1  | C | .0000   | .0000  | .0000  |
| 2  | N | 1.3546  | .0000  | .0000  |
| 3  | N | 2.1580  | .9443  | .0000  |
| 4  | C | 1.8904  | 2.3761 | .0616  |
| 5  | C | .5461   | 2.8515 | .1995  |
| 6  | C | -.4881  | 3.6320 | .2489  |
| 7  | H | -.6487  | .8871  | -.0759 |
| 8  | H | -.4707  | -.9916 | .0661  |
| 9  | H | 2.5021  | 2.7493 | .9408  |
| 10 | H | 2.3542  | 2.8065 | -.8801 |
| 11 | H | -.4429  | 4.7119 | .0328  |
| 12 | H | -1.4865 | 3.2528 | .5162  |

Total Energy = -265.3911 Hartrees

**GAUCHE TS 2**

|    |   |          |          |          |
|----|---|----------|----------|----------|
| 1  | C | -0.72026 | 0.03544  | 2.25840  |
| 2  | C | -1.55733 | 0.93686  | 1.69263  |
| 3  | C | -2.50000 | 0.36022  | 1.04092  |
| 4  | N | -2.20000 | -0.52862 | -0.06812 |
| 5  | N | -1.18084 | -1.40833 | 0.38065  |
| 6  | H | -1.05911 | -0.92120 | 2.66872  |
| 7  | H | 0.32988  | 0.27920  | 2.46738  |
| 8  | H | -1.60000 | 1.00000  | 0.34000  |
| 9  | H | -2.78000 | 0.38224  | 2.16126  |
| 10 | C | 0.00000  | -0.77028 | 0.14831  |
| 11 | H | 0.94349  | -1.28322 | 0.33494  |
| 12 | H | 0.00000  | 0.25394  | -0.22458 |

Total Energy = -265.3749 Hartrees

**ALLYLIC TS3**

|    |   |          |          |          |
|----|---|----------|----------|----------|
| 1  | C | 0.89316  | 1.23886  | 2.35153  |
| 2  | C | 0.11219  | 0.62739  | 1.89955  |
| 3  | C | 0.00000  | 0.00000  | 0.00000  |
| 4  | N | 1.19631  | -0.76449 | 0.00005  |
| 5  | N | 2.07302  | -1.28866 | 0.53276  |
| 6  | C | -1.23807 | 0.07505  | 2.46795  |
| 7  | H | 0.82393  | 1.57002  | 3.39268  |
| 8  | H | 1.78325  | 1.54135  | 1.79123  |
| 9  | H | -0.86333 | -0.53558 | 0.00004  |
| 10 | H | -2.01448 | -0.54239 | 2.00580  |
| 11 | H | -1.39892 | 0.37581  | 3.50841  |
| 12 | H | 0.00000  | 1.09000  | -0.00010 |

Total Energy = -265.3851 Hartrees

**ALLYLIC INT2**

|    |   |        |         |        |
|----|---|--------|---------|--------|
| 1  | C | .0000  | .0000   | .0000  |
| 2  | C | 1.3869 | .0000   | .0000  |
| 3  | C | 2.1146 | 1.3175  | .0000  |
| 4  | N | 1.8817 | 2.1872  | 1.1446 |
| 5  | N | 1.3267 | 2.1654  | 2.1539 |
| 6  | C | 2.1316 | -1.1683 | -.0385 |
| 7  | H | -.5679 | -.9358  | -.0151 |
| 8  | H | -.5751 | .9308   | .0242  |
| 9  | H | 1.8069 | 1.9098  | -.9093 |
| 10 | H | 3.2290 | 1.1554  | -.0448 |
| 11 | H | 3.2259 | -1.1572 | -.0342 |
| 12 | H | 1.6467 | -2.1494 | -.0731 |

Total Energy = -265.4535 Hartrees

**ALLYLIC TS 4**

|    |   |         |         |         |
|----|---|---------|---------|---------|
| 1  | C | .3696   | -1.4801 | -.2638  |
| 2  | N | 1.8469  | -1.4801 | -.2638  |
| 3  | N | 2.4712  | -.4842  | -.2638  |
| 4  | C | .9076   | .9363   | -.2607  |
| 5  | C | -.1565  | -.0592  | -.2542  |
| 6  | C | -1.4623 | .2088   | -.2388  |
| 7  | H | .0264   | -2.0439 | .6457   |
| 8  | H | .0269   | -2.0306 | -1.1816 |
| 9  | H | 1.1329  | 1.4588  | -1.1988 |
| 10 | H | 1.1409  | 1.4634  | .6729   |
| 11 | H | -2.2236 | -.5816  | -.2344  |
| 12 | H | -1.8499 | 1.2357  | -.2306  |

Total Energy = -265.3861 Hartrees

**REGIO 2 PRODUCT**

|    |   |         |        |        |
|----|---|---------|--------|--------|
| 1  | C | .0000   | .0000  | .0000  |
| 2  | N | 1.4935  | .0000  | .0000  |
| 3  | N | 1.9741  | 1.1203 | .0000  |
| 4  | C | .9448   | 2.2025 | .0000  |
| 5  | C | -.3808  | 1.4673 | .0000  |
| 6  | C | -1.5978 | 1.9894 | -.0001 |
| 7  | H | -.3682  | -.5358 | .9125  |
| 8  | H | -.3682  | -.5358 | -.9125 |
| 9  | H | 1.0794  | 2.8387 | -.9124 |
| 10 | H | 1.0793  | 2.8386 | .9126  |
| 11 | H | -2.5033 | 1.3682 | .0000  |
| 12 | H | -1.7717 | 3.0735 | -.0001 |

Total Energy = -265.4650 Hartrees

**ALLENE - NITRILE OXIDE  
CONCERTED TS1**

|    |   |         |         |         |
|----|---|---------|---------|---------|
| 1  | C | -1.7356 | 0.5695  | -0.0000 |
| 2  | N | -1.4658 | -0.6090 | -0.0000 |
| 3  | O | -0.5166 | -1.3806 | 0.0000  |
| 4  | C | 1.1454  | 0.3736  | 0.0000  |
| 5  | C | 0.3197  | 1.4327  | 0.0000  |
| 6  | C | 2.1815  | -0.4265 | -0.0000 |
| 7  | H | -2.6214 | 1.1790  | -0.0000 |
| 8  | H | 0.1331  | 1.9763  | 0.9240  |
| 9  | H | 0.1331  | 1.9763  | -0.9240 |
| 10 | H | 3.1903  | -0.0119 | -0.0000 |
| 11 | H | 2.0932  | -1.5077 | -0.0000 |

Total Energy = -285.2052 Hartrees

**ANTI TS1**

|    |   |         |         |         |
|----|---|---------|---------|---------|
| 1  | C | -0.4521 | -0.5193 | 0.6911  |
| 2  | C | -1.6522 | -0.2820 | 0.1089  |
| 3  | C | -2.7344 | 0.1137  | -0.4923 |
| 4  | C | 0.7078  | 0.8547  | 0.3264  |
| 5  | N | 1.7872  | 0.4502  | -0.1264 |
| 6  | H | -0.4458 | -0.5324 | 1.7840  |
| 7  | H | 0.2024  | -1.2791 | 0.2347  |
| 8  | H | -3.6083 | -0.5312 | -0.5937 |
| 9  | H | -2.8203 | 1.1104  | -0.9324 |
| 10 | H | 0.3939  | 1.8629  | 0.5394  |
| 11 | O | 2.3191  | -0.5981 | -0.4939 |

Total Energy = -285.2086 Hartrees

**ANTI INT1**

|    |   |        |        |         |
|----|---|--------|--------|---------|
| 1  | N | .0000  | .0000  | .0000   |
| 2  | C | 1.3716 | .0000  | .0000   |
| 3  | C | 2.2227 | 1.2192 | .0000   |
| 4  | C | 3.6150 | .9215  | .0363   |
| 5  | C | 4.8549 | .7083  | -.2683  |
| 6  | O | -.7107 | .7799  | -.5069  |
| 7  | H | 1.8305 | -.9829 | .1942   |
| 8  | H | 1.9639 | 1.8634 | .8941   |
| 9  | H | 1.9780 | 1.8349 | -.9184  |
| 10 | H | 5.2381 | .7309  | -1.3018 |
| 11 | H | 5.6097 | .4923  | .5042   |

Total Energy = -285.2519 Hartrees

**ROT TS1**

|    |   |          |          |          |
|----|---|----------|----------|----------|
| 1  | C | 0.00000  | 0.00000  | 0.00000  |
| 2  | C | 1.29500  | 0.00000  | 0.00000  |
| 3  | C | 2.67890  | -0.24866 | 0.20865  |
| 4  | C | 2.93290  | -1.07719 | 1.47969  |
| 5  | N | 3.69720  | -2.30582 | 1.33550  |
| 6  | H | -0.60610 | -0.70283 | 0.59444  |
| 7  | H | -0.57730 | 0.71369  | -0.60826 |
| 8  | H | 3.21360  | 0.73890  | 0.31414  |
| 9  | H | 3.10320  | -0.74830 | -0.70806 |
| 10 | H | 3.49720  | -0.45173 | 2.22711  |
| 11 | O | 4.19840  | -2.93883 | 0.51530  |

Total Energy = -285.2124 Hartrees

## GAUCHE INT 1

|    |   |        |        |         |
|----|---|--------|--------|---------|
| 1  | C | .0000  | .0000  | .0000   |
| 2  | C | 1.2960 | .0000  | .0000   |
| 3  | C | 2.6898 | .2825  | .0000   |
| 4  | C | 3.1535 | .9760  | -1.2451 |
| 5  | N | 3.1008 | 2.2608 | -1.4738 |
| 6  | O | 2.7731 | 3.2689 | -.9797  |
| 7  | H | -.6038 | .9122  | -.1331  |
| 8  | H | -.5761 | -.9294 | .1275   |
| 9  | H | 2.9583 | .8830  | .9177   |
| 10 | H | 3.2526 | -.6957 | .0562   |
| 11 | H | 3.5819 | .3643  | -2.0561 |

Total Energy = -285.2584 Hartrees

## GAUCHE TS 1

|    |   |          |          |          |
|----|---|----------|----------|----------|
| 1  | C | 0.00000  | 0.00000  | 0.00000  |
| 2  | C | 1.35400  | 0.00000  | 0.00000  |
| 3  | C | 2.02471  | -1.19007 | -0.52985 |
| 4  | C | 1.47890  | -2.43889 | 0.25059  |
| 5  | N | 0.10817  | -2.31709 | 0.66476  |
| 6  | H | -0.59885 | -0.56570 | -0.72091 |
| 7  | H | -0.57426 | 0.68589  | 0.63692  |
| 8  | H | 3.13898  | -1.12525 | -0.43917 |
| 9  | H | 1.78849  | -1.34499 | -1.61538 |
| 10 | O | -0.10000 | -1.56291 | 1.77981  |
| 11 | H | 1.64612  | -3.31939 | -0.43240 |

Total Energy = -285.2365 Hartrees

## ALLYLIC TS1

|    |   |          |          |          |
|----|---|----------|----------|----------|
| 1  | C | 3.09205  | -2.29691 | -0.09497 |
| 2  | C | 2.45000  | -1.55000 | 0.24000  |
| 3  | O | 0.56877  | -1.16136 | -0.54863 |
| 4  | N | -0.01000 | -2.39378 | -0.14642 |
| 5  | C | -0.01000 | -3.37075 | 0.46405  |
| 6  | C | 2.55336  | -0.28689 | 1.16191  |
| 7  | H | 4.09660  | -2.35536 | 0.33622  |
| 8  | H | 2.81188  | -3.07546 | -0.81127 |
| 9  | H | 1.85081  | 0.50462  | 1.44044  |
| 10 | H | 3.54333  | -0.25680 | 1.62873  |
| 11 | H | 0.00000  | -4.29513 | 1.04167  |

Total Energy= -285.2081 Hartrees



**ALLYLIC INT 1**

|    |   |        |         |        |
|----|---|--------|---------|--------|
| 1  | C | .0000  | .0000   | .0000  |
| 2  | C | 1.3984 | .0000   | .0000  |
| 3  | C | 2.0601 | 1.2907  | .0000  |
| 4  | N | 3.3612 | 1.5215  | -.0137 |
| 5  | O | 4.3868 | .9645   | -.0294 |
| 6  | C | 2.1207 | -1.1930 | -.0026 |
| 7  | H | -.5601 | -.9398  | -.0017 |
| 8  | H | -.5757 | .9297   | .0018  |
| 9  | H | 1.4398 | 2.2058  | .0131  |
| 10 | H | 3.2151 | -1.2146 | -.0107 |
| 11 | H | 1.6051 | -2.1586 | -.0030 |

Total Energy = -285.2157 Hartrees

**ALLYLIC TS2**

|    |   |        |         |        |
|----|---|--------|---------|--------|
| 1  | C | .0000  | .0000   | .0000  |
| 2  | C | 1.3393 | .0000   | .0000  |
| 3  | C | 2.1680 | 1.2276  | .0000  |
| 4  | N | 3.4326 | 1.0967  | -.0191 |
| 5  | O | 3.8980 | -.0145  | -.0673 |
| 6  | C | 2.1143 | -1.2036 | .0044  |
| 7  | H | -.5693 | -.9435  | .0015  |
| 8  | H | -.5737 | .9404   | -.0019 |
| 9  | H | 1.7182 | 2.2333  | .0257  |
| 10 | H | 2.3393 | -1.7023 | .9585  |
| 11 | H | 2.2837 | -1.7453 | -.9377 |

Total Energy = -285.2495 Hartrees

**REGIO 1 PRODUCT**

|    |   |         |        |        |
|----|---|---------|--------|--------|
| 1  | C | .0000   | .0000  | .0000  |
| 2  | N | 1.3175  | .0000  | .0000  |
| 3  | O | 1.8017  | 1.2242 | .0000  |
| 4  | C | .7103   | 2.2296 | .0000  |
| 5  | C | -.5381  | 1.3848 | .0000  |
| 6  | C | -1.8055 | 1.7778 | -.0001 |
| 7  | H | -.6073  | -.9077 | .0000  |
| 8  | H | .8424   | 2.8401 | -.9236 |
| 9  | H | .8424   | 2.8402 | .9235  |
| 10 | H | -2.6388 | 1.0626 | .0000  |
| 11 | H | -2.0917 | 2.8378 | -.0001 |

Total Energy = -285.3133 Hartrees

**CONCERTED TS2**

|    |   |         |         |         |
|----|---|---------|---------|---------|
| 1  | C | -.1246  | -1.1165 | -1.1712 |
| 2  | N | 1.1182  | -1.1165 | -1.1712 |
| 3  | O | 1.9267  | -.2338  | -1.1712 |
| 4  | C | .5239   | 1.5013  | -1.1365 |
| 5  | C | -.6674  | .8827   | -1.1190 |
| 6  | C | -1.9735 | .8313   | -1.0826 |
| 7  | H | -.9837  | -1.7626 | -1.1738 |
| 8  | H | 1.0144  | 1.7843  | -2.0795 |
| 9  | H | 1.0557  | 1.7591  | -.2086  |
| 10 | H | -2.5512 | -.1021  | -1.0829 |
| 11 | H | -2.5816 | 1.7488  | -1.0486 |

Total Energy = -285.1959 Hartrees

**ANTI TS 2**

|    |   |         |         |        |
|----|---|---------|---------|--------|
| 1  | C | -1.9404 | -2.8582 | .0000  |
| 2  | N | -.7101  | -2.8582 | .0000  |
| 3  | O | .2248   | -2.0663 | .0000  |
| 4  | C | .0080   | -.3139  | -.0216 |
| 5  | C | 1.3002  | .1155   | .0290  |
| 6  | C | 2.5724  | .3551   | .0797  |
| 7  | H | -2.8159 | -3.4726 | .0006  |
| 8  | H | -.6146  | -.2014  | .8871  |
| 9  | H | -.5348  | -.2189  | -.9819 |
| 10 | H | 3.3255  | -.4481  | .1187  |
| 11 | H | 2.9748  | 1.3795  | .0868  |

Total Energy = -285.1771 Hartrees

**ANTI INT 2**

|    |   |        |        |        |
|----|---|--------|--------|--------|
| 1  | C | .0000  | .0000  | .0000  |
| 2  | N | 1.2436 | .0000  | .0000  |
| 3  | O | 2.0431 | 1.0205 | .0000  |
| 4  | C | 1.4968 | 2.3909 | .0059  |
| 5  | C | 2.6058 | 3.2825 | -.0304 |
| 6  | C | 3.8072 | 3.7661 | -.0618 |
| 7  | H | -.8996 | -.5767 | .0001  |
| 8  | H | .8387  | 2.5168 | -.8972 |
| 9  | H | .8904  | 2.5261 | .9431  |
| 10 | H | 4.7111 | 3.1345 | -.0692 |
| 11 | H | 3.9910 | 4.8513 | -.0833 |

Total Energy = -285.1921 Hartrees

**ROT TS 2**

|    |   |          |          |          |
|----|---|----------|----------|----------|
| 1  | C | 0.00000  | 0.00000  | 0.00000  |
| 2  | C | 1.29500  | 0.00000  | 0.00000  |
| 3  | C | 2.67890  | -0.24866 | 0.20865  |
| 4  | C | 2.93290  | -1.07719 | 1.47969  |
| 5  | N | 3.69720  | -2.30582 | 1.33550  |
| 6  | H | -0.60610 | -0.70283 | 0.59444  |
| 7  | H | -0.57730 | 0.71369  | -0.60826 |
| 8  | H | 3.21360  | 0.73890  | 0.31414  |
| 9  | H | 3.10320  | -0.74830 | -0.70806 |
| 10 | H | 3.49720  | -0.45173 | 2.22711  |
| 11 | O | 4.19840  | -2.93883 | 0.51530  |

Total Energy = -285.1883 Hartrees

**GAUCHE INT 2**

|    |   |          |         |          |
|----|---|----------|---------|----------|
| 1  | C | 0.00000  | 0.00000 | 0.00000  |
| 2  | N | 1.35460  | 0.00000 | 0.00000  |
| 3  | O | 2.15800  | 0.90772 | 0.26028  |
| 4  | C | 1.89040  | 2.26708 | 0.71416  |
| 5  | C | 0.54610  | 2.68605 | 0.97775  |
| 6  | C | -0.48810 | 3.42270 | 1.24037  |
| 7  | H | -0.64870 | 0.87366 | 0.17156  |
| 8  | H | 2.50210  | 2.38348 | 1.66216  |
| 9  | H | 2.35420  | 2.94037 | -0.07243 |
| 10 | H | -0.44290 | 4.52033 | 1.33031  |
| 11 | H | -1.48650 | 2.98451 | 1.39280  |

Total Energy = -285.2167 Hartrees

**GAUCHE TS 2**

|    |   |          |          |         |
|----|---|----------|----------|---------|
| 1  | C | -0.72026 | 0.03544  | 2.25840 |
| 2  | C | -1.55733 | -0.14728 | 3.30686 |
| 3  | C | -2.50000 | 0.72288  | 3.31441 |
| 4  | N | -2.20000 | 2.14181  | 3.39597 |
| 5  | O | -1.18084 | 2.39695  | 2.44193 |
| 6  | H | -1.05911 | 0.37063  | 1.27292 |
| 7  | H | 0.32988  | -0.28297 | 2.29971 |
| 8  | H | -2.78000 | -0.12443 | 2.58112 |
| 9  | C | 0.00000  | 2.14268  | 3.07156 |
| 10 | H | 0.94349  | 2.34721  | 2.56549 |
| 11 | H | 0.00000  | 1.73445  | 4.08222 |

Total Energy = -285.2025 Hartrees

ALLYLIC TS3

|    |   |          |          |          |
|----|---|----------|----------|----------|
| 1  | C | 0.00000  | 0.00000  | 0.00000  |
| 2  | C | 1.09000  | 0.00000  | 0.00000  |
| 3  | C | 2.31000  | -1.36959 | 0.80643  |
| 4  | N | 1.88170  | -2.46854 | 0.01620  |
| 5  | O | 1.32670  | -2.92313 | -0.88518 |
| 6  | C | 2.13160  | 1.04962  | -0.51449 |
| 7  | H | -0.56790 | 0.83335  | -0.42600 |
| 8  | H | -0.57510 | -0.83321 | 0.41561  |
| 9  | H | 3.22900  | -0.99913 | 0.58198  |
| 10 | H | 3.22590  | 1.03781  | -0.51308 |
| 11 | H | 1.64670  | 1.93212  | -0.94454 |

Total Energy = -285.2123 Hartrees

ALLYLIC INT2

|    |   |        |         |        |
|----|---|--------|---------|--------|
| 1  | C | .0000  | .0000   | .0000  |
| 2  | C | 1.3984 | .0000   | .0000  |
| 3  | C | 2.0601 | 1.2907  | .0000  |
| 4  | N | 3.3612 | 1.5215  | -.0137 |
| 5  | O | 4.3868 | .9645   | -.0294 |
| 6  | C | 2.1207 | -1.1930 | -.0026 |
| 7  | H | -.5601 | -.9398  | -.0017 |
| 8  | H | -.5757 | .9297   | .0018  |
| 9  | H | 1.4398 | 2.2058  | .0131  |
| 10 | H | 3.2151 | -1.2146 | -.0107 |
| 11 | H | 1.6051 | -2.1586 | -.0030 |

Total Energy = -285.2915 Hartrees

ALLYLIC TS 4

|    |   |         |         |         |
|----|---|---------|---------|---------|
| 1  | C | .3486   | -1.7273 | -.2187  |
| 2  | N | 1.6871  | -1.7273 | -.2187  |
| 3  | O | 2.2933  | -.6779  | -.2187  |
| 4  | C | .6482   | .6740   | -.2107  |
| 5  | C | -.3097  | -.4172  | -.2200  |
| 6  | C | -1.6539 | -.2772  | -.2332  |
| 7  | H | -.2003  | -2.6749 | -.2188  |
| 8  | H | .9366   | 1.1563  | -1.1490 |
| 9  | H | .9477   | 1.1307  | .7371   |
| 10 | H | -2.3250 | -1.1443 | -.2425  |
| 11 | H | -2.1347 | .7079   | -.2354  |

Total Energy = -285.2605 Hartrees

REGIO 2 PRODUCT

|    |   |         |        |        |
|----|---|---------|--------|--------|
| 1  | C | .0000   | .0000  | .0000  |
| 2  | N | 1.3175  | .0000  | .0000  |
| 3  | O | 1.8017  | 1.2242 | .0000  |
| 4  | C | .7103   | 2.2296 | .0000  |
| 5  | C | -.5381  | 1.3848 | .0000  |
| 6  | C | -1.8055 | 1.7778 | -.0001 |
| 7  | H | -.6073  | -.9077 | .0000  |
| 8  | H | .8424   | 2.8401 | -.9236 |
| 9  | H | .8424   | 2.8402 | .9235  |
| 10 | H | -2.6388 | 1.0626 | .0000  |
| 11 | H | -2.0917 | 2.8378 | -.0001 |

Total Energy = -285.3200 Hartrees

**Mailing address:**

Dr.P.VENUVANALINGAM  
DEPARTMENT OF CHEMISTRY  
BHARATHIDASAN UNIVERSITY  
TIRUCHIRAPPALLI – 620 024  
INDIA

**Phone :** ++91 431 660353 (office)  
++91 431 771600 (home)

**Fax:** ++91 431 660245  
++91 431 660320  
++91 431 412750

**E-mail :** [venuvanalingam@yahoo.com](mailto:venuvanalingam@yahoo.com)
